# Supplementary material for: Radiation synthesis of imidazolium-based ionic liquid modified silica adsorbents for ReO4− adsorption
Source: Royal Society of Chemistry journal article supplement (doi:10.1039/d1nj00332a), 2021-01-01
Supplement: d1nj00332a1.pdf [file d1nj00332a1.pdf]

**Radiation synthesis of imidazolium-based ionic liquids modified silica adsorbents  
for  $\text{ReO}_4^-$  adsorption** Kangjun Xie<sup>a, b</sup>, Zhen Dong<sup>a</sup>, Nan Wang<sup>a, b</sup>, Wei Qi<sup>a, b</sup>, Long  
Zhao<sup>a, 1</sup>

<sup>a</sup> State Key Laboratory of Advanced Electromagnetic Engineering and Technology, School of Electrical and Electronic Engineering, Huazhong University of Science and Technology, Wuhan 430074, China

<sup>b</sup> School of Chemistry and Chemical Engineering, Huazhong University of Science and Technology, Wuhan 430074, China

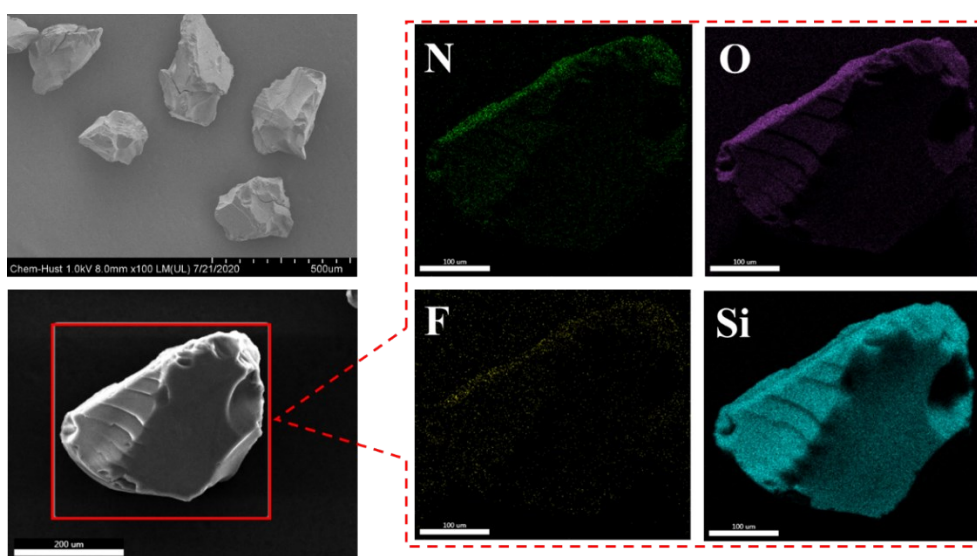

Fig. S1. SEM and elemental mapping images of Si-IL-NO<sub>3</sub>.

---

<sup>1</sup> Corresponding authors:

E-mail addresses: [ryuuchou@hotmail.com](mailto:ryuuchou@hotmail.com), [zhaolong@hust.edu.cn](mailto:zhaolong@hust.edu.cn) (Long Zhao)

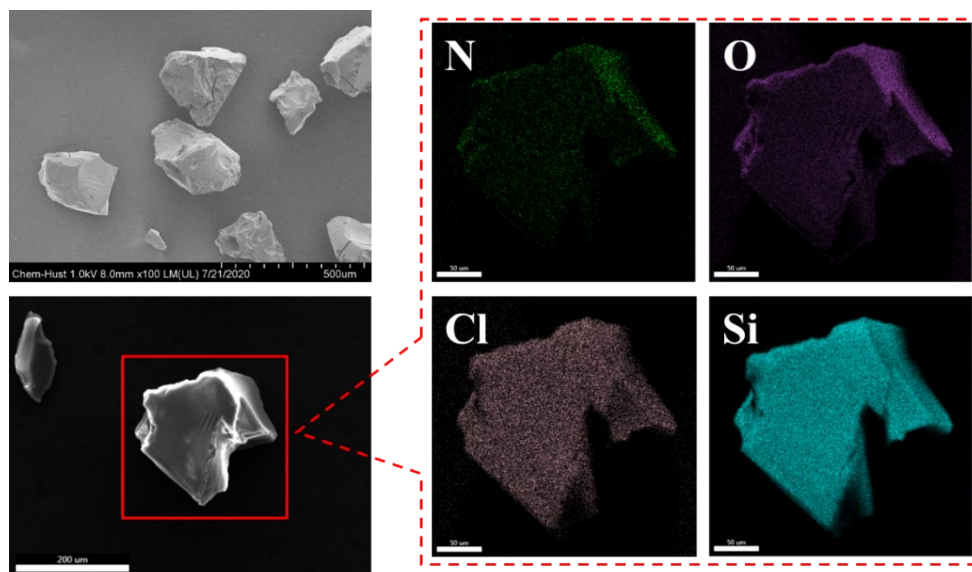

Fig. S2. SEM and elemental mapping images of Si-IL-Cl.

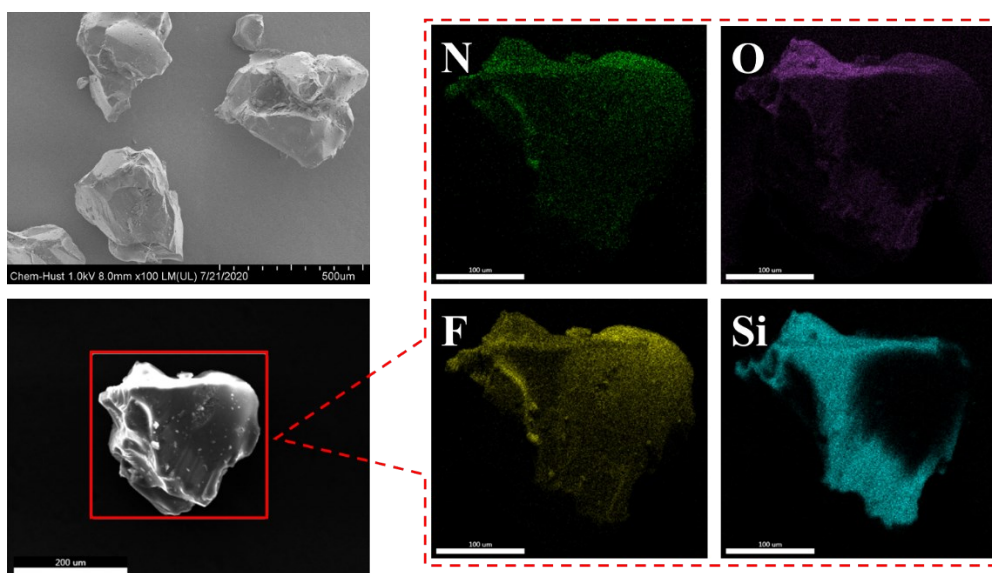

Fig. S3. SEM and elemental mapping images of Si-IL-NTf<sub>2</sub>.

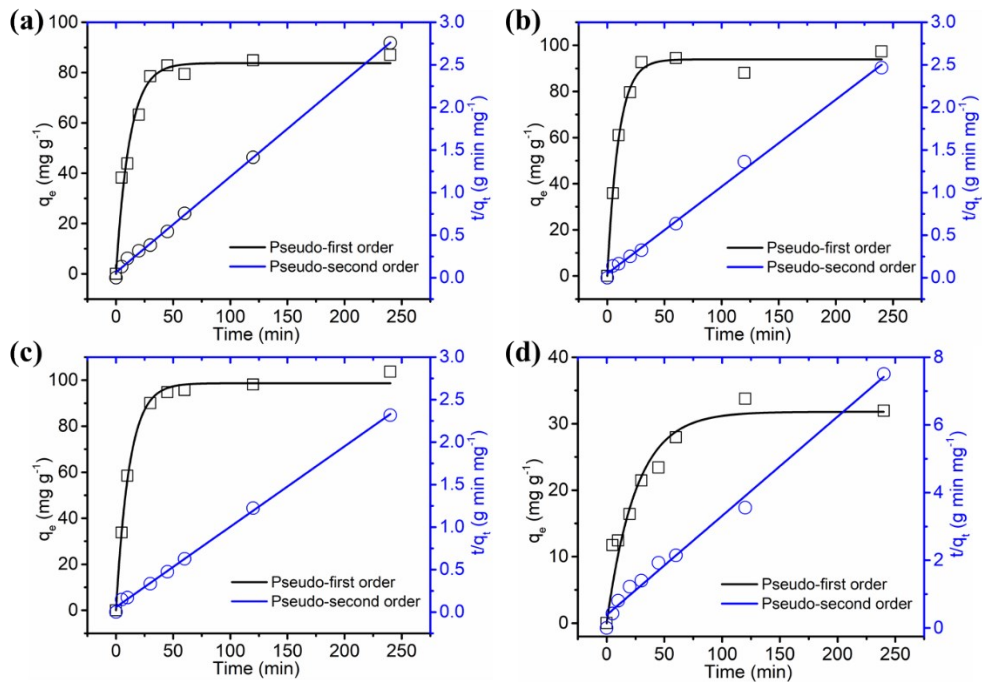

Fig. S4. Fitted adsorption kinetic curves of Si-IL-BF<sub>4</sub> (a), Si-IL-NO<sub>3</sub> (b), Si-IL-Cl (c), and Si-IL-NTf<sub>2</sub> (d).

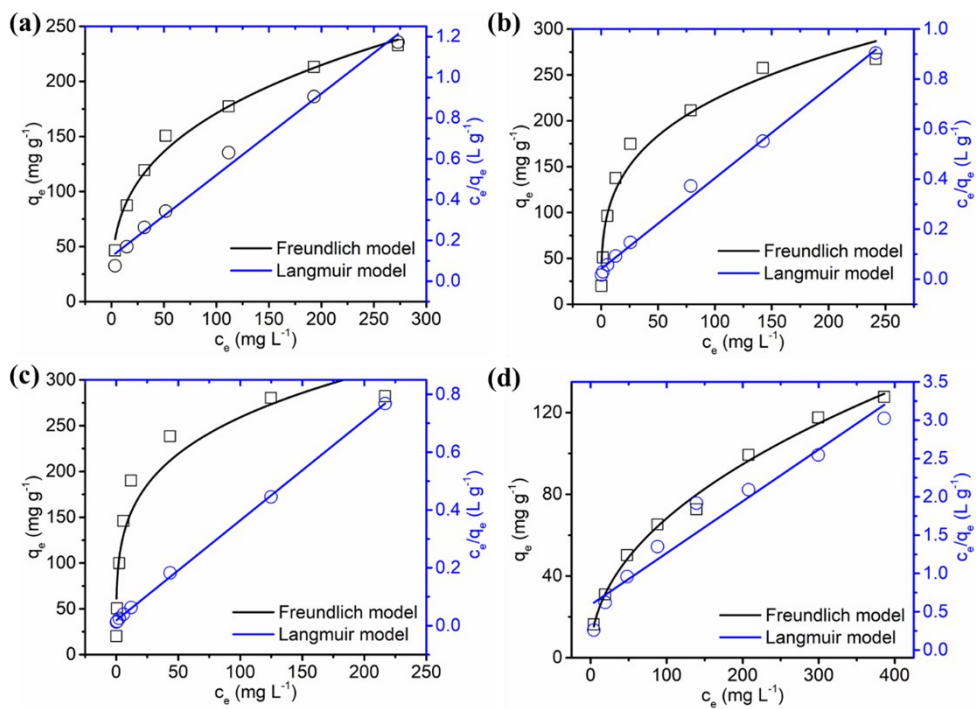

Fig. S5. Fitted adsorption isotherm curves of Si-IL-BF<sub>4</sub> (a), Si-IL-NO<sub>3</sub> (b), Si-IL-Cl (c), and Si-IL-NTf<sub>2</sub> (d).

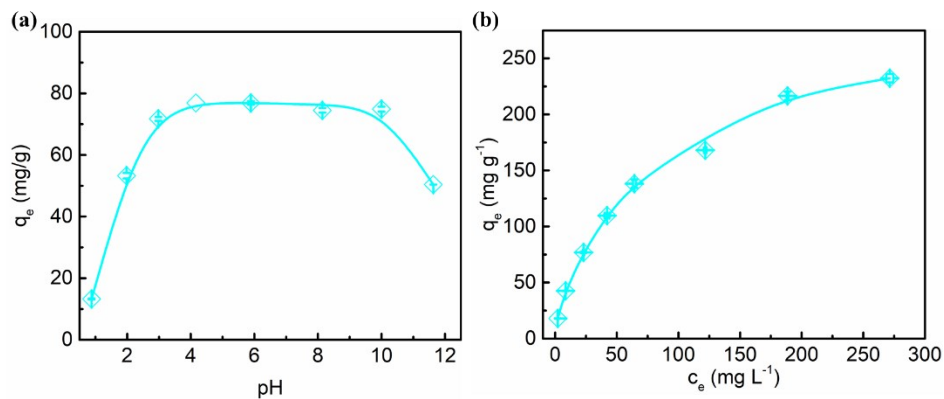

Fig. S6. The effect of pH (a) and initial  $\text{ReO}_4^-$  concentration (b) on the adsorption capacity of Si-IL- $\text{SO}_4$ .

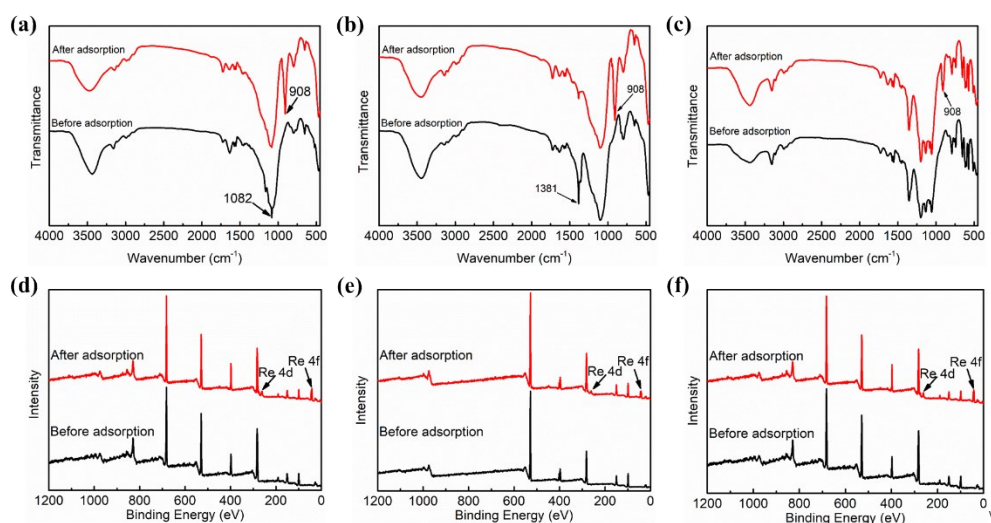

Fig. S7. FT-IR spectra of Si-IL- $\text{BF}_4$  (a), Si-IL- $\text{NO}_3$  (b), and Si-IL- $\text{NTf}_2$  (c) before and after adsorption. XPS spectra of Si-IL- $\text{BF}_4$  (d), Si-IL- $\text{NO}_3$  (e), and Si-IL- $\text{NTf}_2$  (f) before and after adsorption.

Table S1. The composition of the simulated Hanford wastewater.

| Anion              | Concentration ( $\text{mol L}^{-1}$ ) | Molar ratio (anions to $\text{ReO}_4^-$ ) |
|--------------------|---------------------------------------|-------------------------------------------|
| $\text{ReO}_4^-$   | $1.94 \times 10^{-4}$                 | 1.0                                       |
| $\text{NO}_3^-$    | $6.07 \times 10^{-2}$                 | 314                                       |
| $\text{Cl}^-$      | $6.39 \times 10^{-2}$                 | 330                                       |
| $\text{NO}_2^-$    | $1.69 \times 10^{-1}$                 | 873                                       |
| $\text{SO}_4^{2-}$ | $6.64 \times 10^{-5}$                 | 0.34                                      |
| $\text{CO}_3^{2-}$ | $4.30 \times 10^{-4}$                 | 2.22                                      |

Table S2. The composition of the simulated radioactive wastewater.

| Composition        | Concentration ( $\text{mmol L}^{-1}$ ) |
|--------------------|----------------------------------------|
| $\text{ReO}_4^-$   | 0.1                                    |
| $\text{UO}_2^{2+}$ | 0.1                                    |
| $\text{Ce}^{3+}$   | 0.1                                    |

|                  |     |
|------------------|-----|
| Eu <sup>3+</sup> | 0.1 |
| Nd <sup>3+</sup> | 0.1 |
| Sr <sup>2+</sup> | 0.1 |
| La <sup>3+</sup> | 0.1 |
| Sc <sup>3+</sup> | 0.1 |
| HNO <sub>3</sub> | 500 |

---
